# Supplementary material for: Knowledge of, attitudes toward, and preventive practices relating to cholera and oral cholera vaccine among urban high-risk groups: findings of a cross-sectional study in Dhaka, Bangladesh
Source: PubMed Central journal article supplement (PMC3608226; doi:10.1186/1471-2458-13-242), 2013-03-19
Supplement: 1471-2458-13-242-S2.pdf [file 1471-2458-13-242-S2.pdf]

International Centre for Diarrhoeal Disease Research, Bangladesh  
Questionnaire for KAP household survey

Household ID           Name of respondent

GIS ID       Name of household head

Household serial of respondent   PID

**Section 1: Identification & Eligibility of respondent (Please, conduct the interview if age=>18 years)**

| Q. No | Questions                                                                                                                                                                                      | Response Categories                             | Code | Skip Code              |
|-------|------------------------------------------------------------------------------------------------------------------------------------------------------------------------------------------------|-------------------------------------------------|------|------------------------|
| 101   | Are you a member of this family?                                                                                                                                                               | Yes .....1<br>No .....2                         | →    | Carry on the interview |
| 102   | Are you pregnant now?                                                                                                                                                                          | Yes .....1<br>No .....2<br>Not applicable.....3 | →    | End the interview      |
| 103   | Interview result                                                                                                                                                                               | Complete .....1<br>Incomplete.....2             |      |                        |
| 104   | Name of interviewer _____ ID <input type="text"/> Date <input type="text"/> <input type="text"/> <input type="text"/> <input type="text"/> <input type="text"/> <input type="text"/>           |                                                 |      |                        |
| 105   | Name of supervisor _____ ID <input type="text"/> Date <input type="text"/> <input type="text"/> <input type="text"/> <input type="text"/> <input type="text"/> <input type="text"/>            |                                                 |      |                        |
| 106   | Name of the data entry person _____ ID <input type="text"/> Date <input type="text"/> <input type="text"/> <input type="text"/> <input type="text"/> <input type="text"/> <input type="text"/> |                                                 |      |                        |

**Section2: Information about household assets**

| Q. No | Questions                        | Response Categories | Code | Direction |
|-------|----------------------------------|---------------------|------|-----------|
| 201   | Family assets                    | Yes.....1 No.....2  |      |           |
|       | a. Television                    | Yes.....1 No.....2  |      |           |
|       | b. Radio                         | Yes.....1 No.....2  |      |           |
|       | c. Cassette player               | Yes.....1 No.....2  |      |           |
|       | d. DVD/CD player                 | Yes.....1 No.....2  |      |           |
|       | e. Bicycle                       | Yes.....1 No.....2  |      |           |
|       | f. Motorcycle                    | Yes.....1 No.....2  |      |           |
|       | g. Chair / Sofa                  | Yes.....1 No.....2  |      |           |
|       | h. Table                         | Yes.....1 No.....2  |      |           |
|       | i. Sewing machine                | Yes.....1 No.....2  |      |           |
|       | j. Mosquito net                  | Yes.....1 No.....2  |      |           |
|       | k. Electricity                   | Yes.....1 No.....2  |      |           |
|       | l. Gas supply                    | Yes.....1 No.....2  |      |           |
|       | m. Almirrah /wardrobe / showcase | Yes.....1 No.....2  |      |           |
|       | n. Bed                           | Yes.....1 No.....2  |      |           |
|       | o. Mobile phone                  | Yes.....1 No.....2  |      |           |
|       | p. Land phone                    | Yes.....1 No.....2  |      |           |
|       | q. Refrigerator                  | Yes.....1 No.....2  |      |           |

### Section 3: Knowledge on cholera and cholera vaccine

| Section 3a: Knowledge on cholera, its prevention and treatment (please, avoid leading question) |                                              |                                                                                                                                                                                                                                                                                                                                                                                                                                                                                                                                                                                                                                  |      |                  |
|-------------------------------------------------------------------------------------------------|----------------------------------------------|----------------------------------------------------------------------------------------------------------------------------------------------------------------------------------------------------------------------------------------------------------------------------------------------------------------------------------------------------------------------------------------------------------------------------------------------------------------------------------------------------------------------------------------------------------------------------------------------------------------------------------|------|------------------|
| Q. No                                                                                           | Questions                                    | Response Categories                                                                                                                                                                                                                                                                                                                                                                                                                                                                                                                                                                                                              | Code | Direction        |
| 301                                                                                             | Do you know name of any waterborne diseases. | Yes .....1<br>No .....2                                                                                                                                                                                                                                                                                                                                                                                                                                                                                                                                                                                                          | →    | 303              |
| 302                                                                                             | If yes, what are these?                      | Diarrhoea/ Cholera.....A<br>Cholera..... B<br>Dysentery.....C<br>Hepatitis .....D<br>Typhoid .....E<br>Others.....F<br>Do not know.....G                                                                                                                                                                                                                                                                                                                                                                                                                                                                                         | →    | 303a-305<br>306a |
| 303                                                                                             | Have you ever heard of diarrhoea?            | Yes ..... 1<br>No .....2                                                                                                                                                                                                                                                                                                                                                                                                                                                                                                                                                                                                         | →    | 306              |
| 303a                                                                                            | What do you mean by diarrhoea?               | _____<br>_____<br>_____                                                                                                                                                                                                                                                                                                                                                                                                                                                                                                                                                                                                          |      |                  |
| 304                                                                                             | What were the signs & symptoms of diarrhoea? | Passage of 3 or more loose or water stool in 24 hours.....A<br>Repeated vomiting .....B<br>Severe dehydration within very short time .....C<br>Muscles cramp.....D<br>Scanty Urination.....E<br>Other.....F                                                                                                                                                                                                                                                                                                                                                                                                                      |      |                  |
| 305                                                                                             | What are the causes of diarrhoea?            | Lack of safe drinking water .....A<br>Inadequate of safe water supply system..... B<br>Unhygienic disposal of excreta and refuse ..... C<br>High density of population .....D<br>Hot humid climate. ....E<br>Illiteracy, ignorance, and lack of health education.....F<br>Eating rotten food, lack of food protection against contamination.....G<br>Touching food without cleaning hand by soap.....H<br>Not washing hands after defection .....I<br>Unhygienic living environment.....J<br>Not taking vaccines.....K<br>Affected by cholera germ .....L<br>Affected by Rota virus .....M<br>Others.....N<br>Do not know .....O |      | .                |
| 306                                                                                             | Have you ever heard of cholera?              | Yes .....1<br>No .....2                                                                                                                                                                                                                                                                                                                                                                                                                                                                                                                                                                                                          | →    | 319              |
| 306a                                                                                            | What do you mean by cholera?                 | _____<br>_____<br>_____                                                                                                                                                                                                                                                                                                                                                                                                                                                                                                                                                                                                          |      |                  |

| Q. No | Questions                                                             | Response Categories                                                                                                                                                                                                                                                               | Code | Direction                                                       |
|-------|-----------------------------------------------------------------------|-----------------------------------------------------------------------------------------------------------------------------------------------------------------------------------------------------------------------------------------------------------------------------------|------|-----------------------------------------------------------------|
| 307   | What are the signs & symptoms of cholera?                             | Passage of 3 or more loose or water stool in 24 hours.....A<br>Repeated vomiting .....B<br>Severe dehydration within very short time .....C<br>Muscles cramp.....D<br>Scanty Urination.....E<br>Other.....F                                                                       | →    | If the response is 307c, then go to 308, otherwise, skip to 311 |
| 308   | Do you know how to recognize the several stages of dehydration?       |                                                                                                                                                                                                                                                                                   |      |                                                                 |
| 308a  | No symptom of dehydration<br>(Multiple answers acceptable)            | Condition well, alert.....A<br>Eyes are normal.....B<br>Presence of tears in eyes.....C<br>Mouth and tongue are moist.....D<br>Not thirsty, drink normally.....E<br>Skin pinch goes back very quickly..... F<br>Others.....G<br>Do not know .....H                                |      |                                                                 |
| 308b  | Some symptoms of dehydration<br>(Multiple answers acceptable)         | Condition Restless, irritable.....A<br>Eyes are sunken.....B<br>Absence of tears in the eyes.....C<br>Mouth and tongue are dry .....D<br>Thirsty, drink water eagerly.....E<br>Skin pinch goes back slowly.....F<br>Others.....G<br>Do not know .....H                            |      |                                                                 |
| 308c  | Severe dehydration<br>(Multiple answers acceptable)                   | Lethargic or unconscious, floppy .....A<br>Eyes are very sunken & dry.....B<br>Absence of tears in the eyes.....C<br>Mouth and tongue are very dry.....D<br>Drink poorly or unable to drink.....E<br>Skin pinch goes back very slowly.....F<br>Others.....G<br>Do not know .....H |      |                                                                 |
| 309   | What would be the consequences of dehydration?                        | Unconsciousness due to severe dehydration .....A<br>Kidney failure .....B<br>Death.....C<br>Others.....D<br>Do not know .....E                                                                                                                                                    |      |                                                                 |
| 310   | In which stage of dehydration, should a patient be taken to Hospital? | No symptom of dehydration.....1<br>Some symptoms of dehydration.....2<br>Severe dehydration.....3                                                                                                                                                                                 |      |                                                                 |

| Q. No | Questions                                                                                     | Response Categories                                                                                                                                                                                                                                                                                                                                                                                                                                                                                                                                                                                                              | Code | Direction |
|-------|-----------------------------------------------------------------------------------------------|----------------------------------------------------------------------------------------------------------------------------------------------------------------------------------------------------------------------------------------------------------------------------------------------------------------------------------------------------------------------------------------------------------------------------------------------------------------------------------------------------------------------------------------------------------------------------------------------------------------------------------|------|-----------|
| 311   | What are the causes of cholera?<br>(Multiple answers acceptable)                              | Lack of safe drinking water .....A<br>Inadequate of safe water supply system..... B<br>Unhygienic disposal of excreta and refuse ..... C<br>High density of population .....D<br>Hot humid climate. ....E<br>Illiteracy, ignorance, and lack of health education.....F<br>Eating rotten food, lack of food protection against contamination.....G<br>Touching food without cleaning hand by soap.....H<br>Not washing hands after defection .....I<br>Unhygienic living environment.....J<br>Not taking vaccines.....K<br>Affected by cholera germ .....L<br>Affected by Rota virus .....M<br>Others.....N<br>Do not know .....O |      |           |
| 312   | Do you know when does Cholera outbreak occurred each year?<br>(Multiple answers acceptable)   | In Summer.....A<br>In Rainy season .....B<br>In Winter .....C<br>Other.....D<br>Do not know .....E                                                                                                                                                                                                                                                                                                                                                                                                                                                                                                                               |      |           |
| 313   | What type of treatment should be given to a cholera patient?<br>(Multiple answers acceptable) | Packet saline .....A<br>Rice saline.....B<br>IV saline .....C<br>Home-made saline.....D<br>Zink tablet or syrup .....E<br>Antibiotics.....F<br>Herbs.....G<br>Homeopath.....H<br>Plain water.....I<br>Nothing .....J<br>Others.....K<br>Do not know .....L                                                                                                                                                                                                                                                                                                                                                                       |      |           |
| 314   | Who can provide treatment for cholera?<br>(Multiple answers acceptable)                       | M.B.B.S Doctor.....A<br>Nurse.....B<br>Family Welfare Visitor.....C<br>SACMO/Medical Assistant.....D<br>Heath Assistant.....E<br>Family Welfare Assistant.....F<br>Paramedics.....G<br>ICVB Staff/Volunteer .....H<br>Community Health Worker (NGO).....I<br>Pharmacist/Drug sellers/Village Doctor .....J<br>Kabiraj/Hekimi.....K<br>Fakir.....L<br>Homeopath Doctor.....M<br>Relatives.....N<br>Family Members.....O<br>Self.....P<br>Neighbor.....Q<br>Others (specify).....R<br>Do not know.....S                                                                                                                            |      |           |

| Q. No | Questions                                                                                                         | Response Categories                                                                                                                                                                                                                                                                                                                                                                                                                                                                                                                                                                                                                                                                                                                                                                                                     | Code | Direction |
|-------|-------------------------------------------------------------------------------------------------------------------|-------------------------------------------------------------------------------------------------------------------------------------------------------------------------------------------------------------------------------------------------------------------------------------------------------------------------------------------------------------------------------------------------------------------------------------------------------------------------------------------------------------------------------------------------------------------------------------------------------------------------------------------------------------------------------------------------------------------------------------------------------------------------------------------------------------------------|------|-----------|
| 315   | Where can cholera treatment be provided?<br>(Multiple answers acceptable)                                         | At home.....A<br>Health centre.....B<br>Other (please, specify) .....C<br>Do not know.....D                                                                                                                                                                                                                                                                                                                                                                                                                                                                                                                                                                                                                                                                                                                             |      |           |
| 316   | Do you know any health facility where treatment for cholera patient is provided?<br>(Multiple answers acceptable) | Mohakhali cholera Hospital, icddr,b.....A<br>Mirpur cholera Hospital, icddr,b .....B<br>Medical College Hospital (Public).....C<br>Other Govt. hospital .....D<br>Private clinic or hospital .....E<br>NGO clinic or hospital.....F<br>Doctor's chamber.....G<br>Allopathic Pharmacy .....H<br>Homeopath pharmacy .....I<br>Indigenous/ herbal treatment .....J<br>Herbal .....K<br>Others .....L<br>Don't know.....M                                                                                                                                                                                                                                                                                                                                                                                                   |      |           |
| 317   | What do you know about the prevention measures of cholera?<br>(Multiple answers acceptable)                       | Use of safe water for drinking & household works.....A<br>Provision of safe drinking water supply .....B<br>Use of sanitary latrine .....C<br>Satisfactory sewage system/ proper sanitary disposal of excreta, refuse.....D<br>Washing hands with soap before meal.....E<br>Washing hands with soap after defecation.....F<br>Protection of foods (taking fresh food and avoiding rotten food) .....G<br>Housefly control measures..... H<br>Early case finding in the community for the initiation of prompt treatment ..... I<br>Disinfection of all the contaminated articles by phenol, boiling or lime ..... J<br>Good hygiene practice ..... K<br>Health education (advises to drink tube well/ boiled/ tablet treated water etc.).....L<br>Taking cholera vaccine .....M<br>Others..... N<br>Do not know ..... O |      |           |

| Q. No | Questions                                                                                              | Response Categories                                                                                                                                                                                                                                                                                                                                                                       | Code                                                                                                                                                                                                                                                                                                                                                                                                                     | Direction |
|-------|--------------------------------------------------------------------------------------------------------|-------------------------------------------------------------------------------------------------------------------------------------------------------------------------------------------------------------------------------------------------------------------------------------------------------------------------------------------------------------------------------------------|--------------------------------------------------------------------------------------------------------------------------------------------------------------------------------------------------------------------------------------------------------------------------------------------------------------------------------------------------------------------------------------------------------------------------|-----------|
| 318   | How did you know about the cholera, its prevention and treatment?<br><br>(Multiple answers acceptable) | <b>a.Through ICVB</b><br>Individual cards..... A<br>Mobile message ..... B<br>Leaflet..... C<br>Media communication (print ..... D<br>Media communication (electronic .....E<br>Inter personal communication (IPC) by house to house visit of health care providers.....F<br>IPC by house to house visit of volunteers ..... G<br>Banner..... H<br>Others.....I<br>Not applicable ..... J | <b>b.Other (excluding ICVB)</b><br>Leaflet..... A<br>Posters.....B<br>Miking .....C<br>IPC with formal health care providers..... D<br>IPC with other CHWs/ volunteers.....E<br>IPC with neighbour..... F<br>IPC with family/relatives G<br>Media communication (print)..... H<br>Media communication (electronic) ..... I<br>Street drama..... J<br>Personal Experience ..... K<br>Others.....L<br>Not applicable.....M |           |
|       | I. How do you know about cholera? (Multiple answers acceptable)                                        |                                                                                                                                                                                                                                                                                                                                                                                           |                                                                                                                                                                                                                                                                                                                                                                                                                          |           |
|       | II. How do you know about prevention? (Multiple answers acceptable)                                    |                                                                                                                                                                                                                                                                                                                                                                                           |                                                                                                                                                                                                                                                                                                                                                                                                                          |           |
|       | III. How do you know about treatment? (Multiple answers acceptable)                                    |                                                                                                                                                                                                                                                                                                                                                                                           |                                                                                                                                                                                                                                                                                                                                                                                                                          |           |
|       |                                                                                                        |                                                                                                                                                                                                                                                                                                                                                                                           |                                                                                                                                                                                                                                                                                                                                                                                                                          |           |
| 319   | Do you know the names of vaccine preventable diseases?                                                 | Yes.....1<br>No.....2                                                                                                                                                                                                                                                                                                                                                                     | →                                                                                                                                                                                                                                                                                                                                                                                                                        | 321       |
| 320   | If yes, what are those?<br>(Multiple answers acceptable)                                               | Tuberculosis.....A<br>Diphtheria.....B<br>Whooping cough.....C<br>Tetanus.....D<br>Hepatitis.....E<br>Pneumonia.....F<br>Polio militias .....G<br>Measles, mumps, rubella .....H<br>Chickenpox.....I<br>Cholera .....J<br>Other.....K                                                                                                                                                     | →                                                                                                                                                                                                                                                                                                                                                                                                                        | 322       |
| 321   | Have you ever heard about Cholera Vaccine?                                                             | Yes .....1<br>No.....2                                                                                                                                                                                                                                                                                                                                                                    | →                                                                                                                                                                                                                                                                                                                                                                                                                        | 401       |
| 321a  | If yes, what is the name of cholera vaccine?                                                           | ShanChol.....1<br>Dukoral.....2<br>Other.....7<br>Don't know.....9                                                                                                                                                                                                                                                                                                                        |                                                                                                                                                                                                                                                                                                                                                                                                                          |           |

| Q. No | Questions                                                                                      | Response Categories                                                                                                                                                                                                                                                                                                                                                                                         | Code   | Direction  |
|-------|------------------------------------------------------------------------------------------------|-------------------------------------------------------------------------------------------------------------------------------------------------------------------------------------------------------------------------------------------------------------------------------------------------------------------------------------------------------------------------------------------------------------|--------|------------|
| 322   | Do you know about required number of doses of Cholera vaccine?                                 | .....(Nos.)<br>Do not know .....99                                                                                                                                                                                                                                                                                                                                                                          | →      | 324        |
| 323   | What is the interval between two doses?                                                        | .....(Days)<br>Do not know.....99<br>Not applicable.....88                                                                                                                                                                                                                                                                                                                                                  |        |            |
| 324   | Do you know how to administer the cholera vaccine?                                             | Oral vaccine.....1<br>Through injection.....2<br>Other.....7<br>Don't know.....9                                                                                                                                                                                                                                                                                                                            |        |            |
| 325   | Do you know who the eligible for cholera vaccine are? (Multiple answers acceptable)            | Pregnant women.....A<br>Less than one year children.....B<br>One and above year age persons.....C<br>Other.....D<br>Don't know.....E                                                                                                                                                                                                                                                                        |        |            |
| 326   | Do you know the sources of cholera vaccine? (Multiple answers acceptable)                      | Mohakhali cholera Hospital, icddr,b.....A<br>Mirpur cholera Hospital, icddr,b .....B<br>Medical College Hospital (public) .....C<br>Other Government hospital .....D<br>Private clinic/hospital.....E<br>NGO clinic/hospital.....F<br>Private chamber .....G<br>Allopathic pharmacy.....H<br>Homeopathic pharmacy.....I<br>EPI centre.....J<br>It is not available.....K<br>Other.....L<br>Don't know.....M |        |            |
| 327   | Do you know about the benefits of cholera vaccine? (Multiple answers acceptable)               | a. _____<br>b. _____<br>c. _____                                                                                                                                                                                                                                                                                                                                                                            |        |            |
| 328   | Do you know any side-effect/ health problems of cholera vaccine? (Multiple answers acceptable) | Headache ..... A<br>Itching ..... B<br>Weakness ..... C<br>Joint pain..... D<br>Vomiting ..... E<br>Diarrhoea ..... F<br>low blood pressure ..... G<br>Others ..... H<br>Don't know ..... I<br>No problem..... J                                                                                                                                                                                            | →<br>→ | 330<br>330 |

| Q. No                                                                                      | Questions                                                                                                 | Response Categories                                                                                                                                                                                                                                                                                                                                                                                                                                                                                                                                                                                                                                                                                                                                                                                                                                                                                                                                                                                                                                                                                                                                                                                                       | Code            | Direction                 |                         |                |                        |               |                 |               |                                   |                                              |                                        |                                      |                                                                                            |                           |                                                  |                             |                |                                     |              |                                          |                        |                      |  |                            |  |              |  |                      |  |  |
|--------------------------------------------------------------------------------------------|-----------------------------------------------------------------------------------------------------------|---------------------------------------------------------------------------------------------------------------------------------------------------------------------------------------------------------------------------------------------------------------------------------------------------------------------------------------------------------------------------------------------------------------------------------------------------------------------------------------------------------------------------------------------------------------------------------------------------------------------------------------------------------------------------------------------------------------------------------------------------------------------------------------------------------------------------------------------------------------------------------------------------------------------------------------------------------------------------------------------------------------------------------------------------------------------------------------------------------------------------------------------------------------------------------------------------------------------------|-----------------|---------------------------|-------------------------|----------------|------------------------|---------------|-----------------|---------------|-----------------------------------|----------------------------------------------|----------------------------------------|--------------------------------------|--------------------------------------------------------------------------------------------|---------------------------|--------------------------------------------------|-----------------------------|----------------|-------------------------------------|--------------|------------------------------------------|------------------------|----------------------|--|----------------------------|--|--------------|--|----------------------|--|--|
| 329                                                                                        | Do you know where should seek treatment for those problems/ side-effect?<br>(Multiple answers acceptable) | Mohakhali cholera Hospital, icddr,b.....A<br>Mirpur cholera Hospital, icddr,b .....B<br>Medical College Hospital (public) .....C<br>Other Government hospital .....D<br>Private clinic/hospital.....E<br>NGO clinic/hospital.....F<br>Private chamber .....G<br>Allopathic pharmacy.....H<br>Homeopathic pharmacy.....I<br>EPI centre.....J<br>Other.....K<br>Don't know.....L                                                                                                                                                                                                                                                                                                                                                                                                                                                                                                                                                                                                                                                                                                                                                                                                                                            |                 |                           |                         |                |                        |               |                 |               |                                   |                                              |                                        |                                      |                                                                                            |                           |                                                  |                             |                |                                     |              |                                          |                        |                      |  |                            |  |              |  |                      |  |  |
| 330                                                                                        | Do you know the price of cholera vaccine?                                                                 | _____ taka<br>Don't know.....99                                                                                                                                                                                                                                                                                                                                                                                                                                                                                                                                                                                                                                                                                                                                                                                                                                                                                                                                                                                                                                                                                                                                                                                           |                 |                           |                         |                |                        |               |                 |               |                                   |                                              |                                        |                                      |                                                                                            |                           |                                                  |                             |                |                                     |              |                                          |                        |                      |  |                            |  |              |  |                      |  |  |
| 331                                                                                        | How did you know about the cholera vaccine?<br><br>(Multiple answers acceptable)                          | <table border="1"> <thead> <tr> <th>a. Through ICVB</th> <th>b. Other (excluding ICVB)</th> </tr> </thead> <tbody> <tr> <td>Individual cards..... A</td> <td>Leaflet..... A</td> </tr> <tr> <td>Mobile message ..... B</td> <td>Posters.....B</td> </tr> <tr> <td>Leaflet ..... C</td> <td>Miking .....C</td> </tr> <tr> <td>Media communication (print..... D</td> <td>IPC with formal health care providers..... D</td> </tr> <tr> <td>Media communication (electronic .....E</td> <td>IPC with other CHWs/volunteers.....E</td> </tr> <tr> <td>Inter personal communication (IPC) by house to house visit of health care providers .....F</td> <td>IPC with neighbour..... F</td> </tr> <tr> <td>IPC by house to house visit of volunteers..... G</td> <td>IPC with family/relatives G</td> </tr> <tr> <td>Banner ..... H</td> <td>Media communication (print) ..... H</td> </tr> <tr> <td>Others.....I</td> <td>Media communication (electronic) ..... I</td> </tr> <tr> <td>Not applicable ..... J</td> <td>Street drama ..... J</td> </tr> <tr> <td></td> <td>Personal Experience..... K</td> </tr> <tr> <td></td> <td>Others.....L</td> </tr> <tr> <td></td> <td>Not applicable.....M</td> </tr> </tbody> </table> | a. Through ICVB | b. Other (excluding ICVB) | Individual cards..... A | Leaflet..... A | Mobile message ..... B | Posters.....B | Leaflet ..... C | Miking .....C | Media communication (print..... D | IPC with formal health care providers..... D | Media communication (electronic .....E | IPC with other CHWs/volunteers.....E | Inter personal communication (IPC) by house to house visit of health care providers .....F | IPC with neighbour..... F | IPC by house to house visit of volunteers..... G | IPC with family/relatives G | Banner ..... H | Media communication (print) ..... H | Others.....I | Media communication (electronic) ..... I | Not applicable ..... J | Street drama ..... J |  | Personal Experience..... K |  | Others.....L |  | Not applicable.....M |  |  |
| a. Through ICVB                                                                            | b. Other (excluding ICVB)                                                                                 |                                                                                                                                                                                                                                                                                                                                                                                                                                                                                                                                                                                                                                                                                                                                                                                                                                                                                                                                                                                                                                                                                                                                                                                                                           |                 |                           |                         |                |                        |               |                 |               |                                   |                                              |                                        |                                      |                                                                                            |                           |                                                  |                             |                |                                     |              |                                          |                        |                      |  |                            |  |              |  |                      |  |  |
| Individual cards..... A                                                                    | Leaflet..... A                                                                                            |                                                                                                                                                                                                                                                                                                                                                                                                                                                                                                                                                                                                                                                                                                                                                                                                                                                                                                                                                                                                                                                                                                                                                                                                                           |                 |                           |                         |                |                        |               |                 |               |                                   |                                              |                                        |                                      |                                                                                            |                           |                                                  |                             |                |                                     |              |                                          |                        |                      |  |                            |  |              |  |                      |  |  |
| Mobile message ..... B                                                                     | Posters.....B                                                                                             |                                                                                                                                                                                                                                                                                                                                                                                                                                                                                                                                                                                                                                                                                                                                                                                                                                                                                                                                                                                                                                                                                                                                                                                                                           |                 |                           |                         |                |                        |               |                 |               |                                   |                                              |                                        |                                      |                                                                                            |                           |                                                  |                             |                |                                     |              |                                          |                        |                      |  |                            |  |              |  |                      |  |  |
| Leaflet ..... C                                                                            | Miking .....C                                                                                             |                                                                                                                                                                                                                                                                                                                                                                                                                                                                                                                                                                                                                                                                                                                                                                                                                                                                                                                                                                                                                                                                                                                                                                                                                           |                 |                           |                         |                |                        |               |                 |               |                                   |                                              |                                        |                                      |                                                                                            |                           |                                                  |                             |                |                                     |              |                                          |                        |                      |  |                            |  |              |  |                      |  |  |
| Media communication (print..... D                                                          | IPC with formal health care providers..... D                                                              |                                                                                                                                                                                                                                                                                                                                                                                                                                                                                                                                                                                                                                                                                                                                                                                                                                                                                                                                                                                                                                                                                                                                                                                                                           |                 |                           |                         |                |                        |               |                 |               |                                   |                                              |                                        |                                      |                                                                                            |                           |                                                  |                             |                |                                     |              |                                          |                        |                      |  |                            |  |              |  |                      |  |  |
| Media communication (electronic .....E                                                     | IPC with other CHWs/volunteers.....E                                                                      |                                                                                                                                                                                                                                                                                                                                                                                                                                                                                                                                                                                                                                                                                                                                                                                                                                                                                                                                                                                                                                                                                                                                                                                                                           |                 |                           |                         |                |                        |               |                 |               |                                   |                                              |                                        |                                      |                                                                                            |                           |                                                  |                             |                |                                     |              |                                          |                        |                      |  |                            |  |              |  |                      |  |  |
| Inter personal communication (IPC) by house to house visit of health care providers .....F | IPC with neighbour..... F                                                                                 |                                                                                                                                                                                                                                                                                                                                                                                                                                                                                                                                                                                                                                                                                                                                                                                                                                                                                                                                                                                                                                                                                                                                                                                                                           |                 |                           |                         |                |                        |               |                 |               |                                   |                                              |                                        |                                      |                                                                                            |                           |                                                  |                             |                |                                     |              |                                          |                        |                      |  |                            |  |              |  |                      |  |  |
| IPC by house to house visit of volunteers..... G                                           | IPC with family/relatives G                                                                               |                                                                                                                                                                                                                                                                                                                                                                                                                                                                                                                                                                                                                                                                                                                                                                                                                                                                                                                                                                                                                                                                                                                                                                                                                           |                 |                           |                         |                |                        |               |                 |               |                                   |                                              |                                        |                                      |                                                                                            |                           |                                                  |                             |                |                                     |              |                                          |                        |                      |  |                            |  |              |  |                      |  |  |
| Banner ..... H                                                                             | Media communication (print) ..... H                                                                       |                                                                                                                                                                                                                                                                                                                                                                                                                                                                                                                                                                                                                                                                                                                                                                                                                                                                                                                                                                                                                                                                                                                                                                                                                           |                 |                           |                         |                |                        |               |                 |               |                                   |                                              |                                        |                                      |                                                                                            |                           |                                                  |                             |                |                                     |              |                                          |                        |                      |  |                            |  |              |  |                      |  |  |
| Others.....I                                                                               | Media communication (electronic) ..... I                                                                  |                                                                                                                                                                                                                                                                                                                                                                                                                                                                                                                                                                                                                                                                                                                                                                                                                                                                                                                                                                                                                                                                                                                                                                                                                           |                 |                           |                         |                |                        |               |                 |               |                                   |                                              |                                        |                                      |                                                                                            |                           |                                                  |                             |                |                                     |              |                                          |                        |                      |  |                            |  |              |  |                      |  |  |
| Not applicable ..... J                                                                     | Street drama ..... J                                                                                      |                                                                                                                                                                                                                                                                                                                                                                                                                                                                                                                                                                                                                                                                                                                                                                                                                                                                                                                                                                                                                                                                                                                                                                                                                           |                 |                           |                         |                |                        |               |                 |               |                                   |                                              |                                        |                                      |                                                                                            |                           |                                                  |                             |                |                                     |              |                                          |                        |                      |  |                            |  |              |  |                      |  |  |
|                                                                                            | Personal Experience..... K                                                                                |                                                                                                                                                                                                                                                                                                                                                                                                                                                                                                                                                                                                                                                                                                                                                                                                                                                                                                                                                                                                                                                                                                                                                                                                                           |                 |                           |                         |                |                        |               |                 |               |                                   |                                              |                                        |                                      |                                                                                            |                           |                                                  |                             |                |                                     |              |                                          |                        |                      |  |                            |  |              |  |                      |  |  |
|                                                                                            | Others.....L                                                                                              |                                                                                                                                                                                                                                                                                                                                                                                                                                                                                                                                                                                                                                                                                                                                                                                                                                                                                                                                                                                                                                                                                                                                                                                                                           |                 |                           |                         |                |                        |               |                 |               |                                   |                                              |                                        |                                      |                                                                                            |                           |                                                  |                             |                |                                     |              |                                          |                        |                      |  |                            |  |              |  |                      |  |  |
|                                                                                            | Not applicable.....M                                                                                      |                                                                                                                                                                                                                                                                                                                                                                                                                                                                                                                                                                                                                                                                                                                                                                                                                                                                                                                                                                                                                                                                                                                                                                                                                           |                 |                           |                         |                |                        |               |                 |               |                                   |                                              |                                        |                                      |                                                                                            |                           |                                                  |                             |                |                                     |              |                                          |                        |                      |  |                            |  |              |  |                      |  |  |

#### Section 4: Practice on Cholera and its vaccine

##### Section 4a: Practice on cholera and its treatment/management

| Q. No                                                                                                                                                                                                                                                                                                                                                                                                                                                                                                                                                                   | Questions                                                                        | Response Categories                       | Code   | Direction  |
|-------------------------------------------------------------------------------------------------------------------------------------------------------------------------------------------------------------------------------------------------------------------------------------------------------------------------------------------------------------------------------------------------------------------------------------------------------------------------------------------------------------------------------------------------------------------------|----------------------------------------------------------------------------------|-------------------------------------------|--------|------------|
| 401                                                                                                                                                                                                                                                                                                                                                                                                                                                                                                                                                                     | Were you or anyone of your household affected from cholera within last 6 months? | Yes.....1<br>No.....2<br>Don't know.....9 | →<br>→ | 412<br>412 |
| 401a                                                                                                                                                                                                                                                                                                                                                                                                                                                                                                                                                                    | If yes, what was that, diarrhea or cholera?                                      | Diarrhea..... A<br>Cholera..... B         |        |            |
| 402                                                                                                                                                                                                                                                                                                                                                                                                                                                                                                                                                                     | If yes, how many members of your household were affected?                        | _____ (Nos.)                              |        |            |
| <ul style="list-style-type: none"> <li>Please, tell me about the treatment or management of the person who affected by cholera and were present at the study area (give some idea about study area if need)</li> <li>If no member of the household was affected by cholera but a member was affected by diarrhea, then tell me about the treatment or management of the affected person</li> <li>If two or more members of a household were affected, then tell me about the treatment or management of the severe affected or most recently affected person</li> </ul> |                                                                                  |                                           |        |            |

| Q. No | Questions                                                                         | Response Categories                                                                                                                                                                                                                                                                                                                                                                                                                                          | Code | Direction |
|-------|-----------------------------------------------------------------------------------|--------------------------------------------------------------------------------------------------------------------------------------------------------------------------------------------------------------------------------------------------------------------------------------------------------------------------------------------------------------------------------------------------------------------------------------------------------------|------|-----------|
| 403   | The name of affected person                                                       |                                                                                                                                                                                                                                                                                                                                                                                                                                                              |      |           |
| 403 a | The PID of affected person                                                        |                                                                                                                                                                                                                                                                                                                                                                                                                                                              |      |           |
| 404   | What were the sign and symptoms?<br>(Multiple answers acceptable)                 | Passage of 3 or more loose or water stool in 24 hours .....A<br>Repeated vomiting .....B<br>Severe dehydration within very short time .....C<br>Muscles cramp .....D<br>Scanty urination .....E<br>Other.....F                                                                                                                                                                                                                                               |      |           |
| 404a  | How did you confirm that it was cholera?                                          | Through lab diagnosis .....1<br>Formal health care provider's advice ....2<br>Non formal healthcare provider's advice .....3<br>Perception of households .....4<br>Other.....7                                                                                                                                                                                                                                                                               |      |           |
| 405   | What type of treatment was given to the patient?<br>(Multiple answers acceptable) | ORS.....A<br>Rice saline.....B<br>IV saline .....C<br>Homemade saline.....D<br>Zink tablet or syrup .....E<br>Antibiotics.....F<br>Herbs.....G<br>Homeopath.....H<br>Plain water.....I<br>Nothing .....J<br>Others .....K<br>Do not know .....L                                                                                                                                                                                                              |      |           |
| 406   | Was the patient referred from home for treatment?                                 | Yes.....1<br>No.....2                                                                                                                                                                                                                                                                                                                                                                                                                                        | →    | 412       |
| 407   | If yes, where did you seek treatment?<br>(Multiple answers acceptable)            | Mohakhali cholera Hospital, icddr,b ....A<br>Mirpur cholera Hospital, icddr,b .....B<br>Medical College Hospital (public) .....C<br>Other Government hospital.....D<br>Private clinic/hospital.....E<br>NGO clinic/hospital.....F<br>Private chamber .....G<br>Allopathic pharmacy.....H<br>Homeopathic pharmacy.....I<br>Spiritual treatment place .....J<br>Herbal treatment place .....K<br>Other.....L                                                   |      |           |
| 408   | Who referred the patient?<br>(Multiple answers acceptable)                        | M.B.B.S Doctor ..... A<br>Nurse ..... B<br>Family Welfare Visitor..... C<br>SACMO/Medical Assistant..... D<br>Heath Assistant.....E<br>Family Welfare Assistant .....F<br>Paramedics ..... G<br>ICVB Staff/Volunteer ..... H<br>Community Health Worker (NGO).....I<br>Pharmacist/Drug sellers/ Village Doctor ..... J<br>Kabiraj/Hekim ..... K<br>Spiritual healer (Fakir) .....L<br>Homeopath Doctor ..... M<br>No one ..... N<br>Others (specify) ..... O |      |           |

| Q. No | Questions                                                                                            | Response Categories                                                                                                                                                                                                                                                                                                                                                                                                                                                                                                                                                                                                                                                                                                                                                                                                                                    | Code | Direction |
|-------|------------------------------------------------------------------------------------------------------|--------------------------------------------------------------------------------------------------------------------------------------------------------------------------------------------------------------------------------------------------------------------------------------------------------------------------------------------------------------------------------------------------------------------------------------------------------------------------------------------------------------------------------------------------------------------------------------------------------------------------------------------------------------------------------------------------------------------------------------------------------------------------------------------------------------------------------------------------------|------|-----------|
| 409   | Who made decision from your household to take the patient to hospital?                               | Own ..... 1<br>Husband..... 2<br>Wife..... 3<br>Mother/ father..... 4<br>Mother-in-law/ Father-in-law ..... 5<br>Other members of the family ..... 6<br>Other relatives ..... 7<br>Other (Specify) ..... 77                                                                                                                                                                                                                                                                                                                                                                                                                                                                                                                                                                                                                                            |      |           |
| 410   | How much money was required for treatment of the patient?                                            | a. Medicine_____ (tk)<br>b. Transportation_____ (tk)<br>c. Other_____ (tk)<br>d. Total_____ (tk)                                                                                                                                                                                                                                                                                                                                                                                                                                                                                                                                                                                                                                                                                                                                                       |      |           |
| 411   | Was there any problem to reach the health facility?<br>(Multiple answers acceptable)                 | Transportation problem .....A<br>Lack of money ..... B<br>Did not have address of health facility where cholera treatment is available..... C<br>Jam ..... D<br>Other ..... E<br>No problem.....F                                                                                                                                                                                                                                                                                                                                                                                                                                                                                                                                                                                                                                                      |      |           |
| 412   | What measures have you undertaken to prevent cholera in your house?<br>(Multiple answers acceptable) | Use of safe water for drinking & household works ..... A<br>Provision of safe drinking water supply.B<br>Use of sanitary latrine/ Proper sanitary disposal of excreta, refuse ..... C<br>Satisfactory sewage system ..... D<br>Washing hands with soap before meal.. E<br>Washing hands with after defecation . ..F<br>Protection of foods (taking hot food and avoiding rotten food)..... G<br>Housefly control measures ..... H<br>Early case finding in the community for the initiation of prompt treatment.....<br>.....I<br>Disinfection of all the contaminated articles by phenol, boiling or lime ..... J<br>Good hygiene practice..... K<br>Health education (advises to drink tube well/ boiled/ tablet treated water etc.)...L<br>Taking cholera vaccine..... M<br>Others ..... N<br>Do not know ..... O<br>No measures have taken ..... P |      |           |

| Q. No                                                                                            | Questions                                                     | Response Categories                                                                                                                                                                                                                                                                                                                                                                   | Code   | Direction  |
|--------------------------------------------------------------------------------------------------|---------------------------------------------------------------|---------------------------------------------------------------------------------------------------------------------------------------------------------------------------------------------------------------------------------------------------------------------------------------------------------------------------------------------------------------------------------------|--------|------------|
| 413                                                                                              | Please, mention your last experience on the following matters |                                                                                                                                                                                                                                                                                                                                                                                       |        |            |
|                                                                                                  | a. Safe water was used for drinking purpose                   | Yes.....1<br>No .....2                                                                                                                                                                                                                                                                                                                                                                |        |            |
|                                                                                                  | b. Safe water was used for household works                    | Yes.....1<br>No .....2                                                                                                                                                                                                                                                                                                                                                                |        |            |
|                                                                                                  | c. Washed hand before taking last meal                        | Yes.....1<br>No..... 2                                                                                                                                                                                                                                                                                                                                                                |        |            |
|                                                                                                  | d. Used sanitary latrine                                      | Yes..... 1<br>No..... 2                                                                                                                                                                                                                                                                                                                                                               |        |            |
|                                                                                                  | e. Washed hands with soap after defecation                    | Yes..... 1<br>No..... 2                                                                                                                                                                                                                                                                                                                                                               |        |            |
|                                                                                                  | f. Took fresh food                                            | Yes..... 1<br>No..... 2                                                                                                                                                                                                                                                                                                                                                               |        |            |
| <b>Section 4b: Practice on cholera vaccine (if 321=2, skip this section and go to section 5)</b> |                                                               |                                                                                                                                                                                                                                                                                                                                                                                       |        |            |
| 414                                                                                              | Have you ever received Cholera vaccine?                       | Yes..... 1<br>No..... 2                                                                                                                                                                                                                                                                                                                                                               | →<br>→ | 416<br>415 |
| 415                                                                                              | If no- why?<br>(Multiple answers acceptable)                  | Afraid of side effect.....A<br>Busy with work .....B<br>Did not know about cholera vaccination schedule..... C<br>The vaccination center was far away from my home.....D<br>Not informed .....E<br>It is costly ..... F<br>Do not know about address of vaccination centre .....G<br>No need of vaccine .....H<br>Others.....I                                                        | →      | 501        |
| 416                                                                                              | If yes- why?                                                  | To prevent cholera.....A<br>To keep health well .....B<br>By following others.....C<br>Others .....D                                                                                                                                                                                                                                                                                  |        |            |
| 416a                                                                                             | Which cholera vaccine did you receive?                        | ShanChol.....1<br>Dukoral.....2<br>Other.....7                                                                                                                                                                                                                                                                                                                                        |        |            |
| 417                                                                                              | From where did you receive the vaccine?                       | Mohakhali cholera Hospital, icddr,b. ....1<br>Mirpur cholera Hospital, icddr,b .....2<br>Medical College Hospital (public) .....3<br>Other Government hospital.....4<br>Private clinic/hospital.....5<br>NGO clinic/hospital.....6<br>Private chamber .....7<br>Allopathic pharmacy.....8<br>Homeopathic pharmacy.....9<br>EPI centre .....10<br>Not available.....11<br>Other.....12 |        |            |
| 418                                                                                              | How many doses did you receive?                               | _____(Nos.)<br>Do not know ..... 99                                                                                                                                                                                                                                                                                                                                                   |        |            |

| Q. No | Questions                                                                     | Response Categories                                                                                                                                                                                                                                                                                                                                                                                                                                                                         | Code | Direction                 |
|-------|-------------------------------------------------------------------------------|---------------------------------------------------------------------------------------------------------------------------------------------------------------------------------------------------------------------------------------------------------------------------------------------------------------------------------------------------------------------------------------------------------------------------------------------------------------------------------------------|------|---------------------------|
| 419   | If two doses, what was the interval between two doses?                        | _____ (Days.)<br>Do not know .....99<br>Not applicable.....88                                                                                                                                                                                                                                                                                                                                                                                                                               |      |                           |
| 420   | Did you like the test of the vaccine?                                         | Yes..... 1<br>No ..... 2                                                                                                                                                                                                                                                                                                                                                                                                                                                                    | →    | 422                       |
| 421   | If no- why didn't you like?<br>(Multiple answers acceptable)                  | a. _____<br>b. _____<br>c. _____                                                                                                                                                                                                                                                                                                                                                                                                                                                            |      |                           |
| 422   | Did you face any health problems after vaccination?                           | Yes..... 1<br>No ..... 2                                                                                                                                                                                                                                                                                                                                                                                                                                                                    | →    | 431                       |
| 423   | If yes- what were the problems?<br>(Multiple answers acceptable)              | Headache .....A<br>Itching.....B<br>Weakness.....C<br>Joint pain .....D<br>Vomiting.....E<br>Diarrhoea.....F<br>Others .....G                                                                                                                                                                                                                                                                                                                                                               |      |                           |
| 424   | How long did you suffer for this problem?                                     | _____ hours _____ min                                                                                                                                                                                                                                                                                                                                                                                                                                                                       |      | Write 00<br>if <1<br>hour |
| 425   | Did you seek treatment for the problems?                                      | Yes..... 1<br>No ..... 2                                                                                                                                                                                                                                                                                                                                                                                                                                                                    | →    | 431                       |
| 426   | If yes, what type of treatment did you take?<br>(Multiple answers acceptable) | Herbs.....A<br>Spiritual.....B<br>Allopathic.....C<br>Homeopath.....D<br>Other (specify) .....E                                                                                                                                                                                                                                                                                                                                                                                             |      |                           |
| 427   | Who provided the treatment?<br>(Multiple answers acceptable)                  | M.B.B.S Doctor .....A<br>Nurse..... B<br>Family Welfare Visitor .....C<br>SACMO/Medical Assistant.....D<br>Heath Assistant.....E<br>Family Welfare Assistant.....F<br>Paramedics.....G<br>ICVB Staff/Volunteer .....H<br>Community Health Worker (NGO). ....I<br>Pharmacist/Drug sellers/Village Doctor<br>.....J<br>Kabiraj/Hekimi.....K<br>Fakir.....L<br>Homeopath Doctor.....M<br>Relatives.....N<br>Family Members.....O<br>Self ..... P<br>Neighbor.....Q<br>Others (specify) ..... R |      |                           |

| Q. No | Questions                                                           | Response Categories                                                                                                                                                                                                                                                                                                                                                                                                                                                                                     | Code | Direction |
|-------|---------------------------------------------------------------------|---------------------------------------------------------------------------------------------------------------------------------------------------------------------------------------------------------------------------------------------------------------------------------------------------------------------------------------------------------------------------------------------------------------------------------------------------------------------------------------------------------|------|-----------|
| 428   | Did you visit any health facility for the treatment of the problem? | Yes..... 1<br>No ..... 2                                                                                                                                                                                                                                                                                                                                                                                                                                                                                | →    | 431       |
| 429   | If yes, where did you visit?<br>(Multiple answers acceptable)       | Mohakhali cholera Hospital, icddr,.....A<br>Mirpur cholera Hospital, icddr,b .....B<br>Medical College Hospital (public) .....C<br>Other Government hospital.....D<br>Private clinic/hospital.....E<br>NGO clinic/hospital.....F<br>Private chamber .....G<br>Allopathic pharmacy.....H<br>Homeopathic pharmacy.....I<br>Spiritual treatment place .....J<br>Other.....K                                                                                                                                |      |           |
| 430   | How much money was required for treatment of the patient?           | a. Medicine_____ (tk)<br>b. Transportation_____ (tk)<br>c. Other_____ (tk)<br>d. Total_____ (tk)                                                                                                                                                                                                                                                                                                                                                                                                        |      |           |
| 431   | Who encouraged you to take this vaccine?                            | M.B.B.S Doctor .....01<br>Nurse..... 02<br>Family Welfare Visitor.....03<br>SACMO/Medical Assistant.....04<br>Heath Assistant.....05<br>Family Welfare Assistant.....06<br>Paramedics.....07<br>ICVB Staff/Volunteer .....08<br>Community Health Worker (NGO).....09<br>Pharmacist/Drug sellers/Village Doctor<br>.....10<br>Kabiraj/Hekim.....11<br>Fakir.....12<br>Homeopath Doctor.....13<br>Relatives.....14<br>Family Members.....15<br>Self.....16<br>Neighbour.....17<br>Others (specify).....77 |      |           |

### Section 5: Attitude towards Cholera and cholera vaccine

| Please, give your opinion how much you agree on the following statements |                                                               |                                                                    |      |           |
|--------------------------------------------------------------------------|---------------------------------------------------------------|--------------------------------------------------------------------|------|-----------|
| Q. No                                                                    | Questions                                                     | Response Categories                                                | Code | Direction |
| 501                                                                      | It may cause disease if stool is passed at anywhere           | Fully agreed..... 1<br>Partially agreed..... 2<br>Disagreed..... 3 |      |           |
| 502                                                                      | We should wash our hands before having food                   | Fully agreed..... 1<br>Partially agreed..... 2<br>Disagreed..... 3 |      |           |
| 503                                                                      | We should wash our both hands by soap or ash after defecation | Fully agreed..... 1<br>Partially agreed..... 2<br>Disagreed..... 3 |      |           |

| Q. No | Questions                                                | Response Categories                                                | Code | Direction |
|-------|----------------------------------------------------------|--------------------------------------------------------------------|------|-----------|
| 504   | Cholera is a severe health problem which may cause death | Fully agreed..... 1<br>Partially agreed..... 2<br>Disagreed..... 3 |      |           |
| 505   | Cholera is very serious for adults                       | Fully agreed..... 1<br>Partially agreed..... 2<br>Disagreed..... 3 |      |           |
| 506   | Cholera is very serious for children                     | Fully agreed..... 1<br>Partially agreed..... 2<br>Disagreed..... 3 |      |           |
| 507   | Cholera is common in the community                       | Fully agreed..... 1<br>Partially agreed..... 2<br>Disagreed..... 3 |      |           |
| 508   | Cholera can be prevented through vaccination             | Fully agreed..... 1<br>Partially agreed..... 2<br>Disagreed..... 3 |      |           |
| 509   | Cholera vaccine may be harmful for health                | Fully agreed..... 1<br>Partially agreed..... 2<br>Disagreed..... 3 | →    | 511       |
| 510   | If agreed, why do you think so?                          | a. _____<br>b. _____<br>c. _____                                   |      |           |
| 511   | We should encourage people for cholera vaccination       | Fully agreed..... 1<br>Partially agreed..... 2<br>Disagreed..... 3 |      |           |

#### Section 6: Recommendation for ICVB project

| Q. No | Questions                                                                   | Response Categories              | Code | Direction |
|-------|-----------------------------------------------------------------------------|----------------------------------|------|-----------|
| 601   | Do you have any suggestion for a successful implementation of ICVB project? | Yes..... 1<br>No ..... 2         | →    | Section 7 |
| 602   | If yes, what are those suggestions?                                         | a. _____<br>b. _____<br>c. _____ |      |           |

#### Section 7: Other observations/Note (If you do not have anything to note down, please skip to q801)

|  |
|--|
|  |
|--|

#### Final Section

| Q. No | Questions               | Response Categories                     | Code | Direction    |
|-------|-------------------------|-----------------------------------------|------|--------------|
| 801   | Date of data collection | ...../...../ 201____<br>day/ month/year |      |              |
| 802   | Start time of interview | ..... / .....<br>Hour / minute          |      | Railway time |
| 803   | End time of interview   | ..... / .....<br>Hour / minute          |      | Railway time |
